# Supplementary material for: Inspired by the Nature: A Post-printed Strategy to Efficiently Elaborate Parahydrophobic Surfaces
Source: MDPI journal article supplement (doi:10.3390/biomimetics7030122), 2022-08-28
Supplement: s1 [file s1]

# Supplementary Materials: Inspired by the Nature: A Post-printed Strategy to Efficiently Elaborate Parahydrophobic Surfaces

Jordy Queiros Campos <sup>1</sup>, Caroline R. Szczepanski <sup>2</sup>, Marie Gabrielle Medici <sup>1</sup> and Guilhem Godeau <sup>1,3,\*</sup>

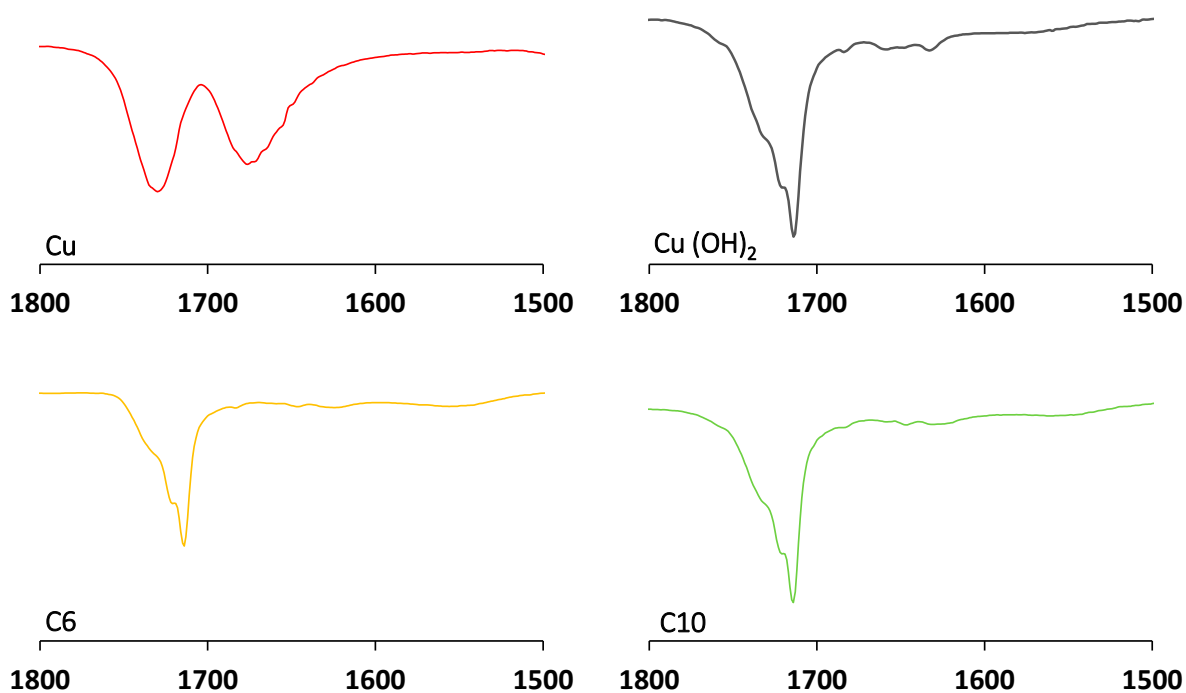

**Figure S1.** Examples of IR spectra for raw and functionalized surfaces.
